# Supplementary material for: Novel Oncolytic Virus Armed with Cancer Suicide Gene and Normal Vasculogenic Gene for Improved Anti-Tumor Activity
Source: PubMed Central journal article supplement (PMC7281019; doi:10.3390/cancers12051070), 2020-04-25
Supplement: cancers-12-01070-s001.pdf [file cancers-12-01070-s001.pdf]

# Supplementary Materials: Novel Oncolytic Virus Armed with Cancer Suicide Gene and Normal Vasculogenic Gene for Improved Anti-Tumor Activity

Su-Nam Jeong and So Young Yoo

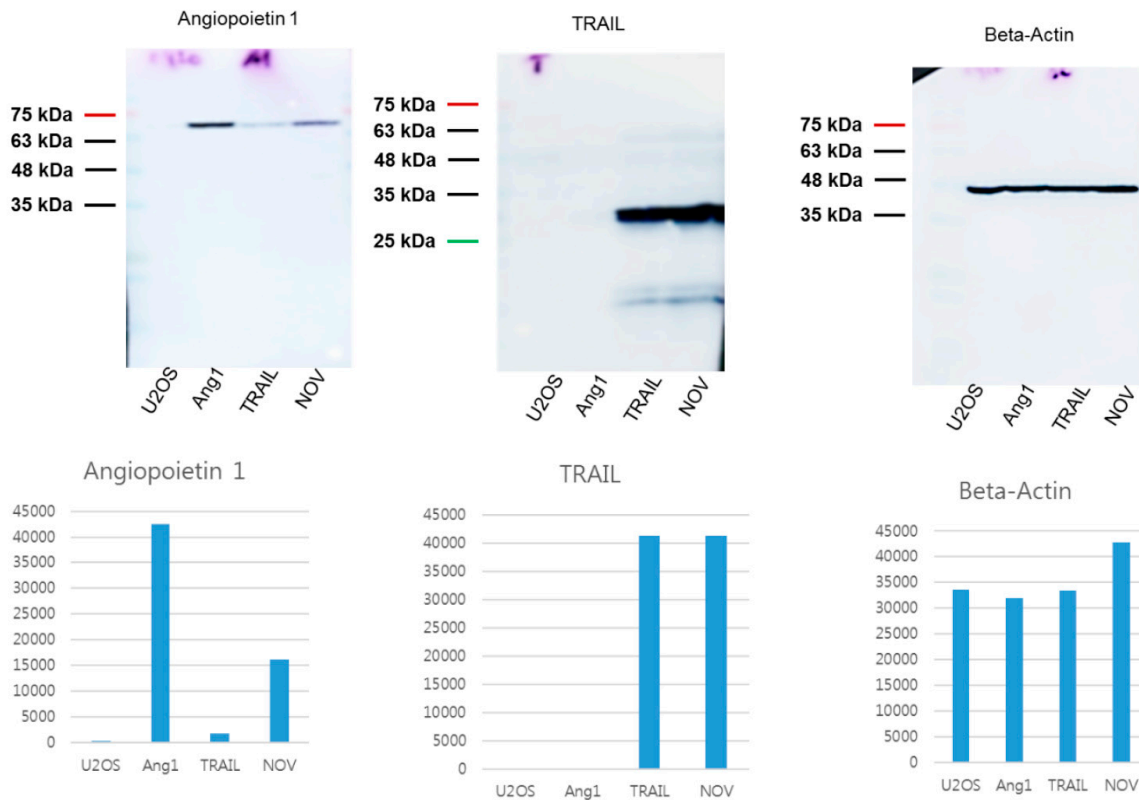

**Figure S1.** Western blots to detect Angiopoietin 1, TRAIL, and beta-actin in U2OS cells 48 h after virus infection (0.1 MOI). Densitometry readings of each corresponding bands are shown in the graph below.

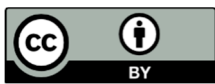

© 2020 by the authors. Licensee MDPI, Basel, Switzerland. This article is an open access article distributed under the terms and conditions of the Creative Commons Attribution (CC BY) license (<http://creativecommons.org/licenses/by/4.0/>).
